# Supplementary material for: A Statistical Framework for Joint eQTL Analysis in Multiple Tissues
Source: PLOS journal article supplement (doi:10.1371/journal.pgen.1003486), 2013-05-09

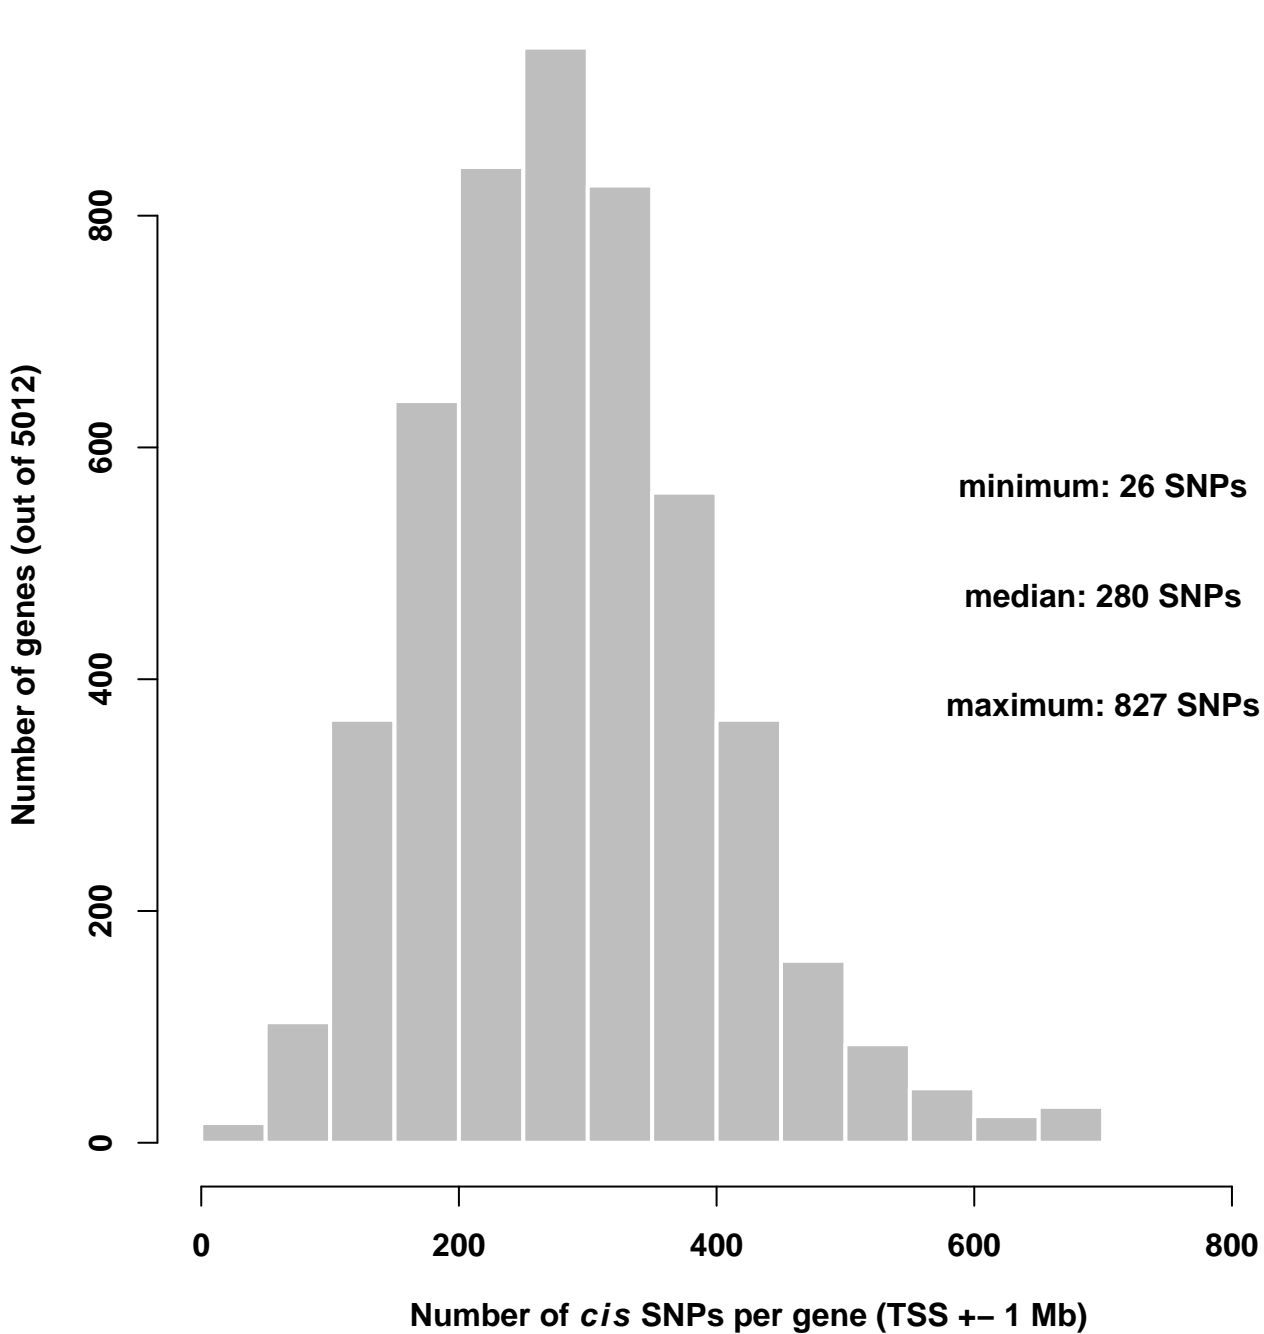

Supplement: S3 (10.1371/journal.pgen.1003486.s003) [file journal.pgen.1003486.s003]
